# Supplementary material for: Solvent-triggered relaxative spin state switching of [Fe(HB(pz)3)2] in a closed nano-confinement of NH2-MIL-101(Al)
Source: Royal Society of Chemistry journal article supplement (doi:10.1039/c6tc01297c), 2016-01-01
Supplement: c6tc01297c1.pdf [file c6tc01297c1.pdf]

## Electronic Supplementary Information (ESI)

# Solvent-triggered relaxative spin state switching of [Fe(HB(pz)<sub>3</sub>)<sub>2</sub>] in closed nano-confinement of NH<sub>2</sub>-MIL- 101(Al)<sup>†</sup>

Tian Zhao,<sup>a</sup> Ishtvan Boldog,<sup>\*,a</sup> Vojislav Spasojevic,<sup>b</sup> Aurelian Rotaru<sup>c</sup>, Yann Garcia<sup>d</sup> and Christoph Janiak<sup>\*,a</sup>

<sup>a</sup> Institut für Anorganische Chemie und Strukturchemie, Universität Düsseldorf, Universitätsstr. 1, D-40225 Düsseldorf, Germany. \*E-mails: [tianzhao696@yahoo.com.hk](mailto:tianzhao696@yahoo.com.hk), [ishtvan.boldog@gmail.com](mailto:ishtvan.boldog@gmail.com), [janiak@uni-duesseldorf.de](mailto:janiak@uni-duesseldorf.de)

<sup>b</sup> Belgrade University, Institute for Nuclear Sciences, P. O. Box 522, 11001 Beograd, Serbia. E-mail: [vojas@vin.bg.ac.rs](mailto:vojas@vin.bg.ac.rs)

<sup>c</sup> Dept. of Electrical Engineering and Computer Science, Ștefan cel Mare University, University Street 13, 720229 Suceava, Romania. E-mail: [aurelian.rotaru@usm.ro](mailto:aurelian.rotaru@usm.ro)

<sup>d</sup> Institute of Condensed Matter and Nanosciences, Molecules, Solids and Reactivity (IMCN/MOST), Université catholique de Louvain, Place L. Pasteur 1, 1348 Louvain-la-Neuve, Belgium. E-mail: [yann.garcia@uclouvain.be](mailto:yann.garcia@uclouvain.be)

### Molecular structure of $[\text{Fe}(\text{HB}(\text{pz})_3)_2]$

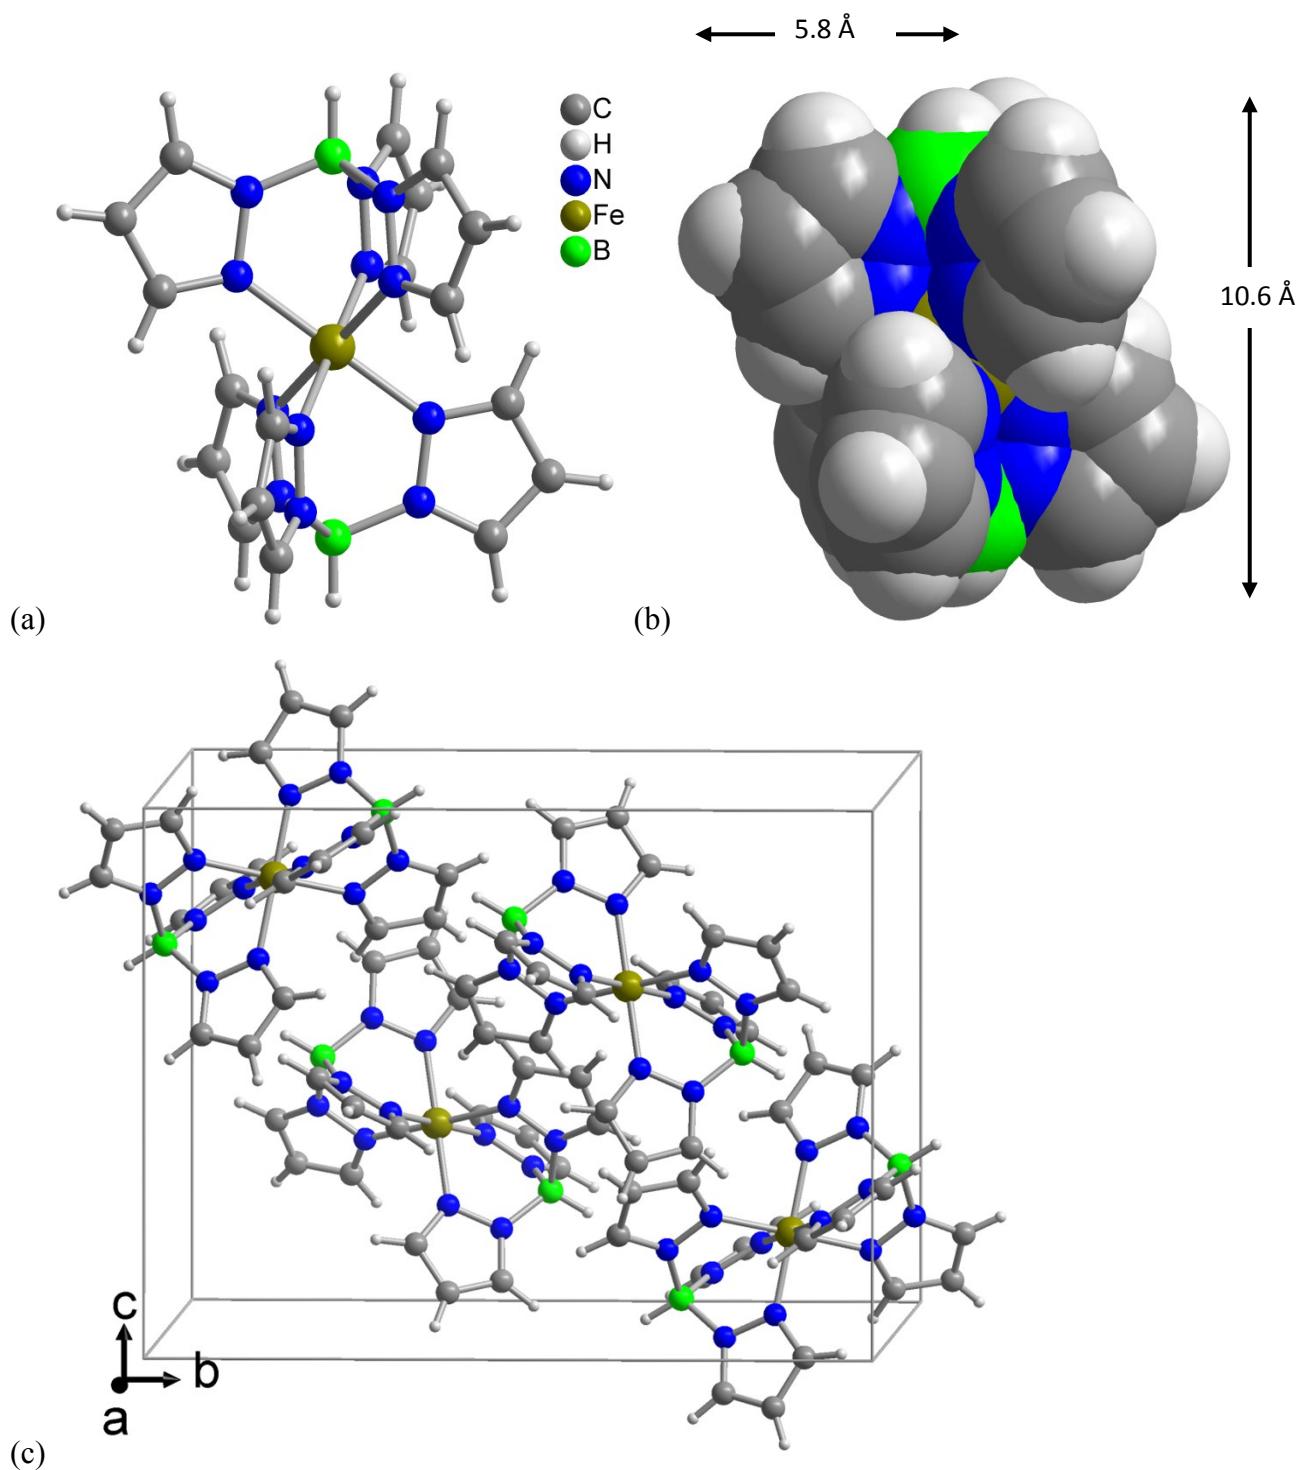

**Fig. S1** Single-crystal X-ray structure of  $[\text{Fe}(\text{HB}(\text{pz})_3)_2]$  (Refcode HPZBFE03);<sup>1</sup> (a) ball-and-stick presentation, (b) space-filling presentation of single molecule, (c) unit-cell packing.

*Estimation of the molecular volume of  $[\text{Fe}(\text{HB}(\text{pz})_3)_2]$ :* the shape of the molecule is approximated by a cylinder with a height of 10.6 Å and a radius of 5.8 Å (Fig. S1b). The height is estimated as the H(B)⋯(B)H distance of 8.16 Å and twice of the van-der-Waals radius of a hydrogen atom 1.2 Å, which add up to ~10.6 Å.

The radius is estimated from the H(4-C)⋯ B distance of 4.60 Å with the vdW radius of the hydrogen atom, 1.2 Å, added to give 5.8 Å. The volume of the model cylinder is  $\pi r^2 h = 3.14 \times (5.8)^2 \times 10.6 \text{ Å}^3 = 357 \text{ Å}^3$ .

On the other hand the volume of space associated with a single molecule, as derived from one of the reported single-crystal XRD structures of  $[\text{Fe}(\text{HB}(\text{pz})_3)_2]$  with unit cell volume of 2157.85(78) Å<sup>3</sup> and  $Z = 4$ , is  $2158 / 4 = 540 \text{ Å}^3$ .

The ratio of the two values,  $357 / 540 = 0.66$  is in effect the estimated packing coefficient and it is within the range of 0.65-0.77 characteristic for the majority of molecular crystals,<sup>2</sup> which corroborates the molecular volume estimation by using the simple cylinder model.

### Scanning electron microscopy

Scanning electron microscopy (SEM) images (Fig. S2) show the morphology of NH<sub>2</sub>-MIL-101(Al) with irregular particles, which is in a good agreement with the reported literature.<sup>3</sup> The morphology of S@M composites is similar to the bulk NH<sub>2</sub>-MIL-101(Al). This supports the assumption that the iron containing species should be located inside the pores of NH<sub>2</sub>-MIL-101(Al).

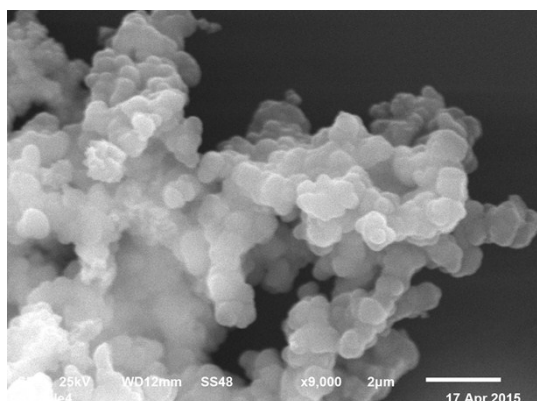

NH<sub>2</sub>-MIL-101(Al)

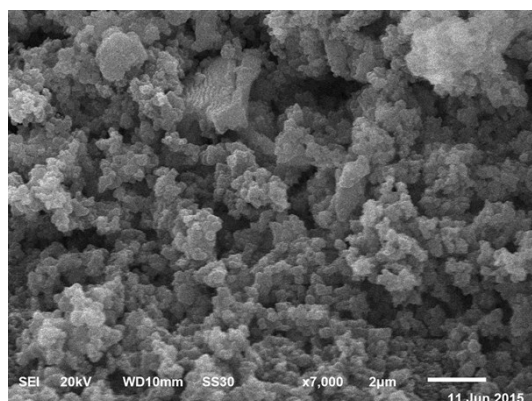

S@M-1

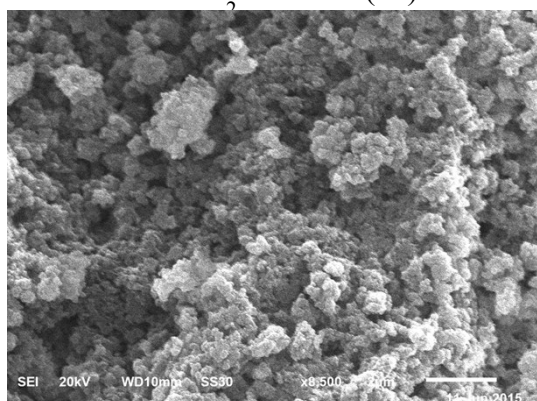

S@M-2

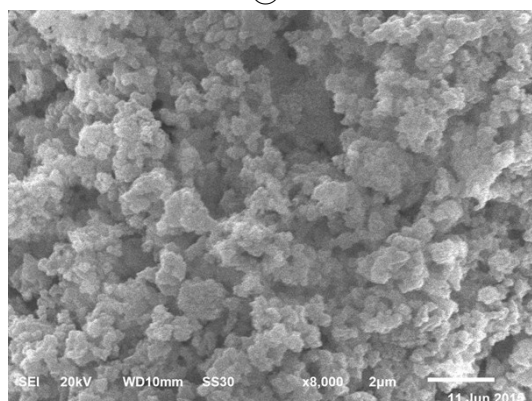

S@M-3

**Fig. S2a** SEM images of S@M materials in comparison to the bulk NH<sub>2</sub>-MIL-101(Al).

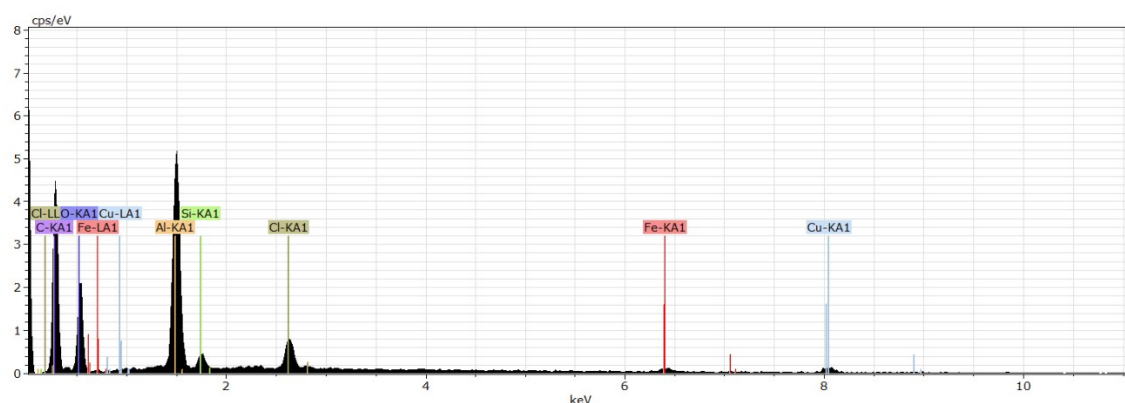

Fig. S2b Energy-dispersive X-ray spectrum of S@M-1 with peak assignment. Determination of the Al : Fe ratio was based on the Al-KA1 and the Fe-KA1 peaks (KA =  $K\alpha$ )

### Temperature stability of S@M samples and thermogravimetric analysis of $[\text{Fe}(\text{HB}(\text{pz})_3)_2]$

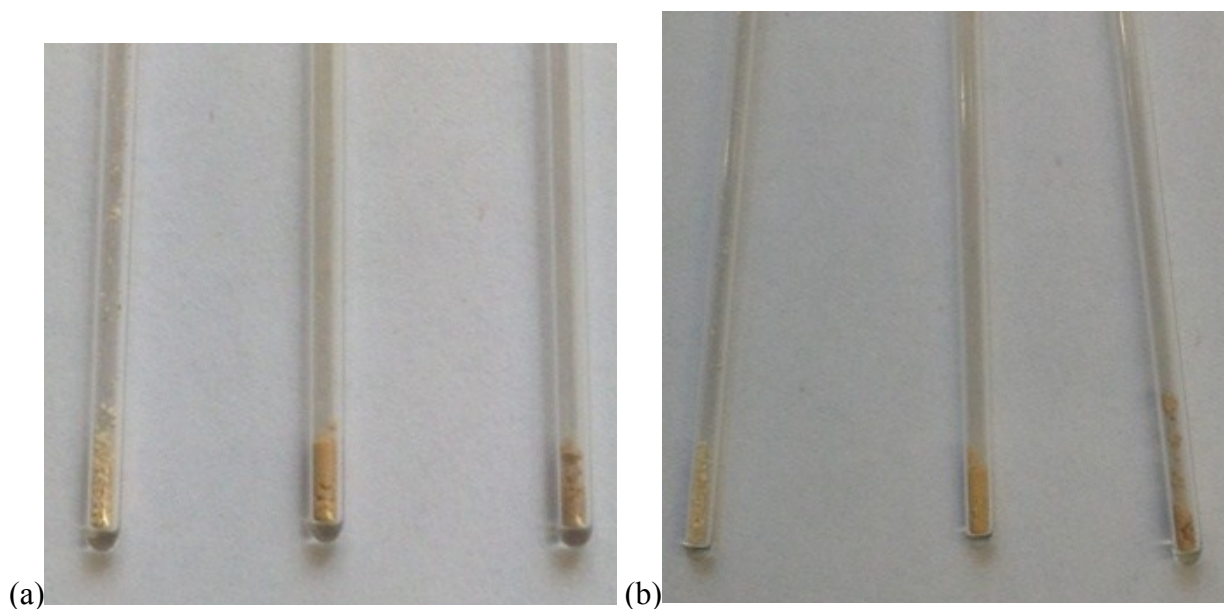

**Fig. S3** Photographs of the S@M sample at 25 °C (a) and after heating to 230 °C (503 K) (b). The order from left to right is S@M-1, S@M-2 and S@M-3 for each photograph.

The photographs in Fig. S3b were taken after heating in a melting point determination device to 230 °C, with a heating rate of 10 °C/ min. After heating, all samples kept the same color, and the SCO still can be triggered by the addition of solvent; in this case, methanol was used.

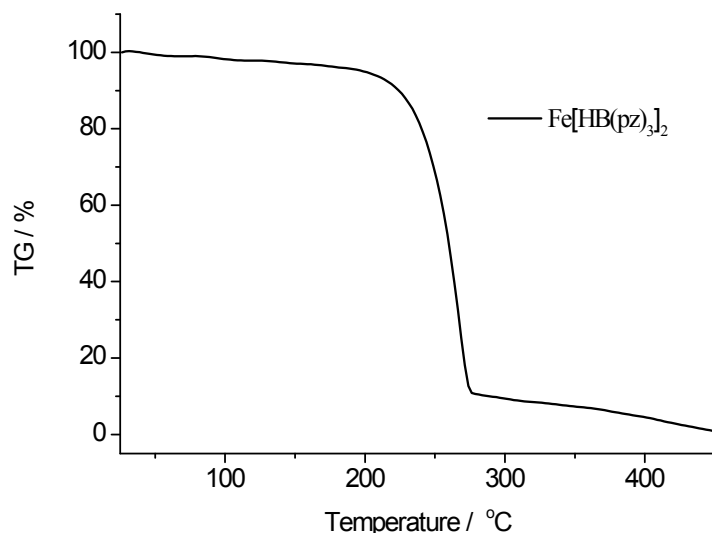

**Fig. S4** TG curve for  $[\text{Fe}(\text{HB}(\text{pz})_3)_2]$ , which shows sublimation of the complex above 220 °C under nitrogen gas and ambient pressure.

### Temperature dependent magnetism of $[\text{Fe}(\text{HB}(\text{pz})_3)_2]$ and the S@M materials

*Introductory note.*  $\mu$  is magnetic moment per one  $\text{Fe}^{2+}$  ion given in Bohr magnetons ( $\mu_B$ ). For spin only value magnetic moment can be calculated as  $\mu = g\sqrt{S(S+1)} \mu_B$ , or experimentally from the  $\mu = \sqrt{8\chi_{\text{mol}}T}$  relation. For 4 unpaired electrons, and for spin only magnetic moment,  $\chi_{\text{mol}}T$  ought to be 3 emu K  $\text{Oe}^{-1}\text{mol}^{-1}$ . In low spin state, LS,  $S = 0$ , i.e.  $\mu = 0$  and complex should be diamagnetic. In practice it is not so because of a number of factors. Among them the existing positive temperature independent paramagnetism of Fe(II) and the presence of species with non-zero spin, as  $^5\text{T}_{2g}$  level (HS) is populated in some degree even at low temperatures, and because of  $\text{Fe}^{3+}$  admixtures.

In high spin state with 4 unpaired electrons  $S = 2$  and  $\mu = 4.9 \mu_B$  (it is assumed that  $g = 2$ , where  $g$  is the Lande factor). In the real world values are usually larger, because spin-orbit interaction contributes to some extent. For Fe(II)  $L = 2$  and  $S = 2$ , and maximal magnetic moment can be about  $5.48 \mu_B$ . In the literature some authors claim that acceptable value for  $\chi_{\text{mol}}T$  product, for Fe(II) complexes, is up to  $3.92 \text{ emu K mol}^{-1} \text{ Oe}^{-1}$ , i.e.  $\mu = 5.6 \mu_B$ .<sup>4</sup>

Literature data regarding  $[\text{Fe}(\text{HB}(\text{pz})_3)_2]$  complex.

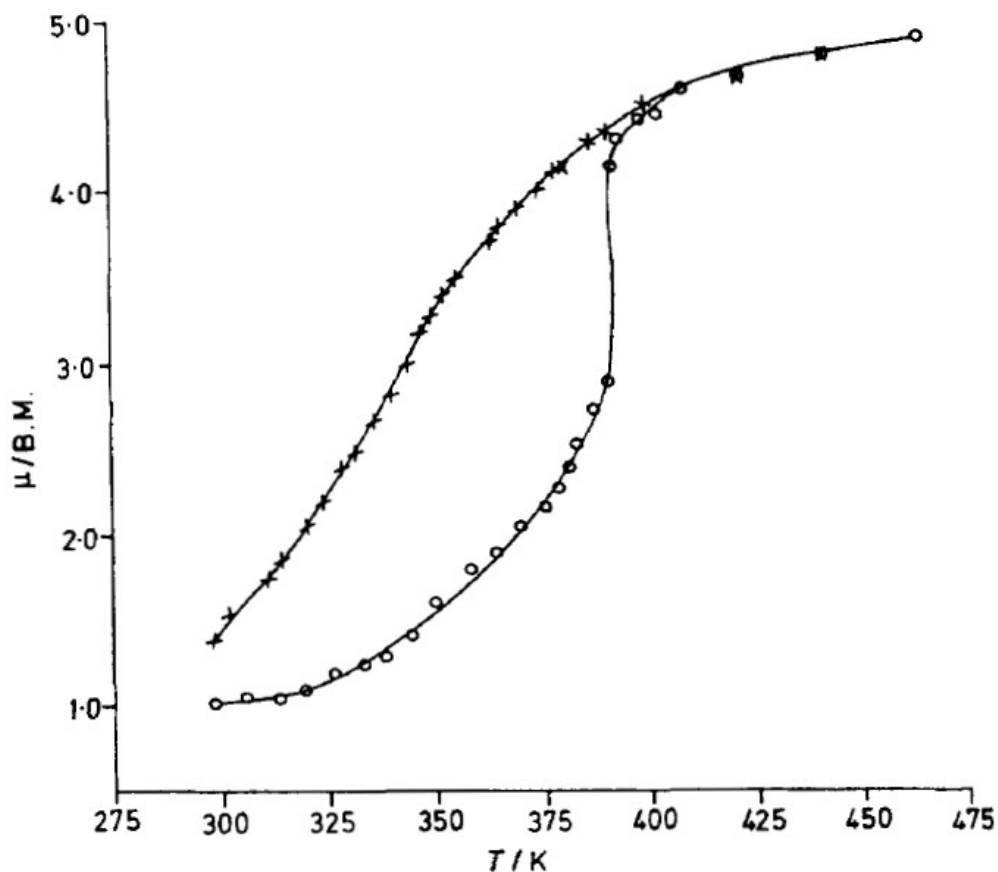

**Fig. S5** Temperature dependence of the effective magnetic moment of crystalline  $[\text{Fe}(\text{HB}(\text{pz})_3)_2]$  (open sphere for heating and cross for cooling). Figure taken from ref. 5.

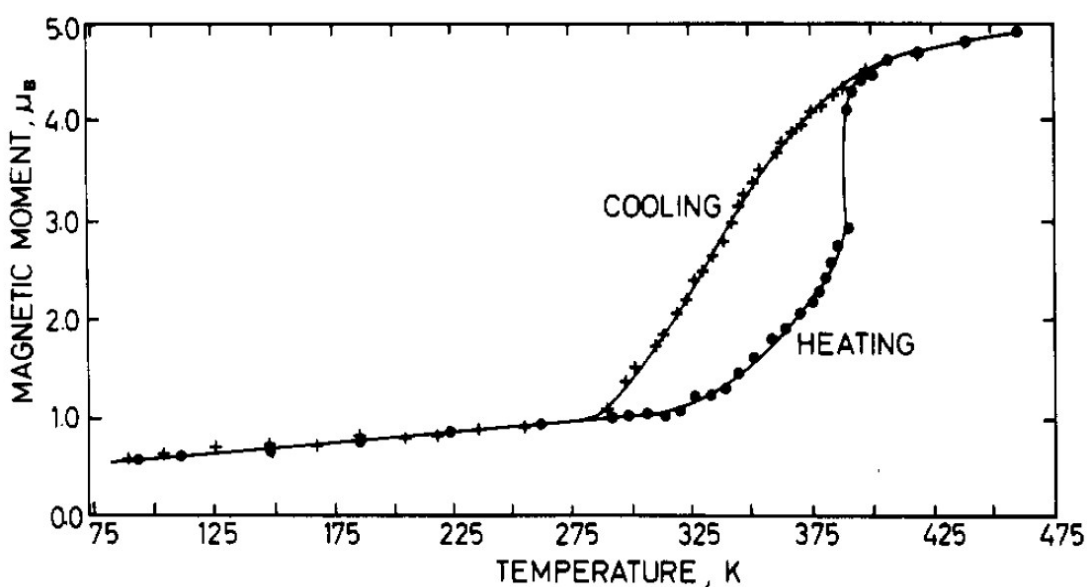

**Fig. S6** Temperature dependence of the magnetic moment for  $[\text{Fe}(\text{HB}(\text{pz})_3)_2]$  during heating and cooling. The figure is taken from ref.6

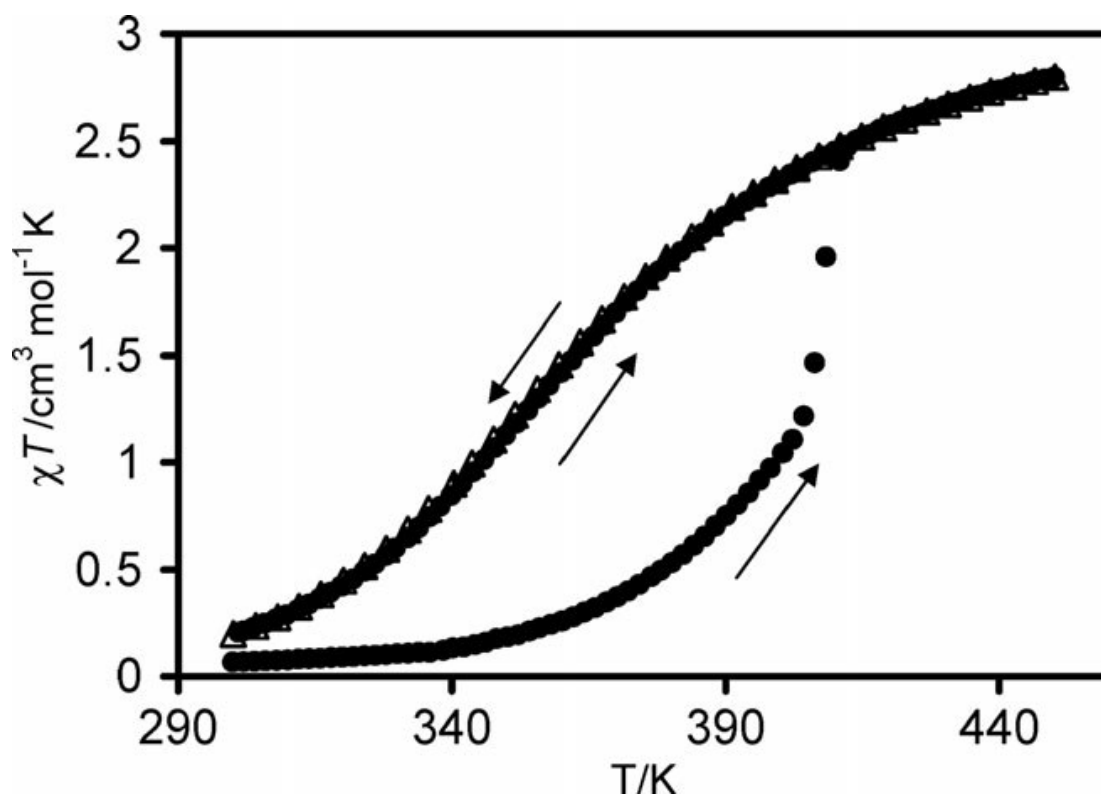

**Fig. S7** The temperature dependence of the  $\chi_M T$  product of  $[\text{Fe}(\text{HB}(\text{pz})_3)_2]$  upon two successive thermal cycles (first cycle: closed circles, second cycle: open triangles). The figure is taken from ref. 1.

*Experimental data on S@M composites.* The molar susceptibilities were calculated as given below. Assuming that all the iron in the sample is incorporated in the form of  $[\text{Fe}(\text{HB}(\text{pz})_3)_2]$ , the relative content of the latter is calculated using the iron content determined by the AAS analytics. The content of actual content of the iron complex and the matrix in a sample with a weight  $m$  is  $m \cdot x$  and  $m \cdot (1-x)$ , where  $x$  is the calculated content of the iron complex. The calculated weights allow to apply the diamagnetic corrections. In the case of the matrix it was determined experimentally for a non loaded sample to be  $\chi_{\text{dia}} = -1.1 \cdot 10^{-9} \cdot T - 2.2 \cdot 10^{-7} \text{ emu g}^{-1} \text{ Oe}^{-1}$ , while for the  $[\text{Fe}(\text{HB}(\text{pz})_3)_2]$  the value of  $-3.55 \cdot 10^{-4} \text{ emu g}^{-1} \text{ Oe}^{-1}$  estimated from the Pascal constants were used. The corrected absolute values of the susceptibilities,  $\text{emu Oe}^{-1}$ , are related to molar quantities,  $v = m \cdot x / M_{\text{FeL2}}$ , ( $M_{\text{FeL2}} = 481.9$ ), thus giving the molar values, from which, subsequently the magnetic moment per one Fe-ion in Bohr magnetons is calculated using the  $\mu = 2.828(\chi_{\text{mol}} \cdot T)^{0.5}$ .

The spin-only value for one moles of iron ions is 4.9 Bohr magnetons,  $\mu_B$ , but experimentally this value might be up to 5.6.

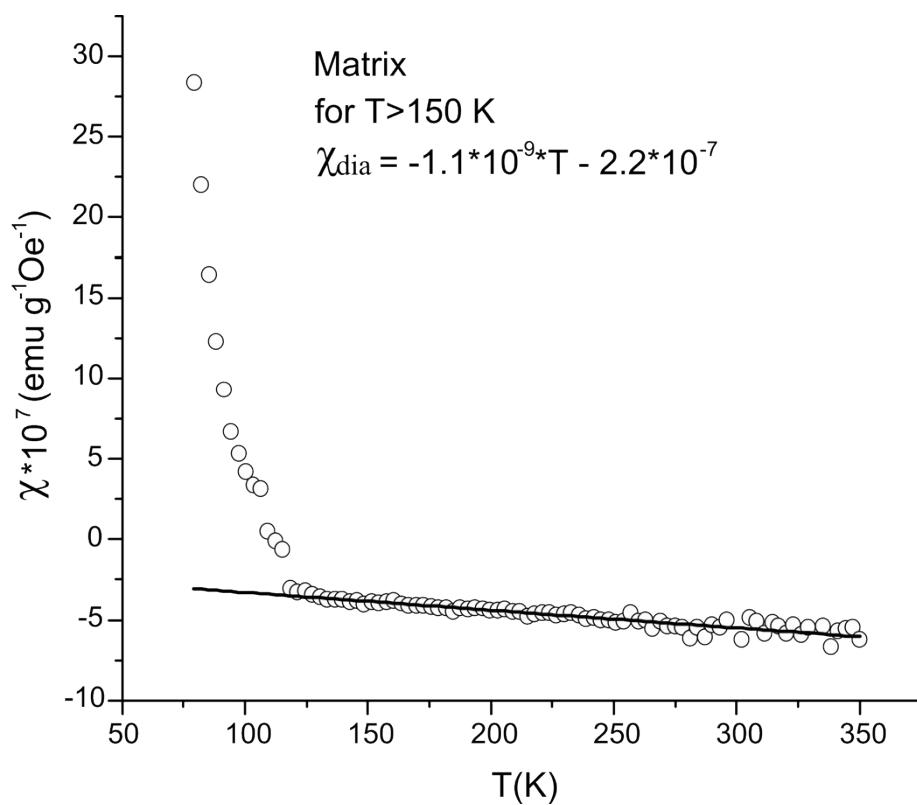

**Fig S8** Temperature-variable magnetic curve for  $\text{NH}_2\text{-MIL-101(Al)}$  reference sample.

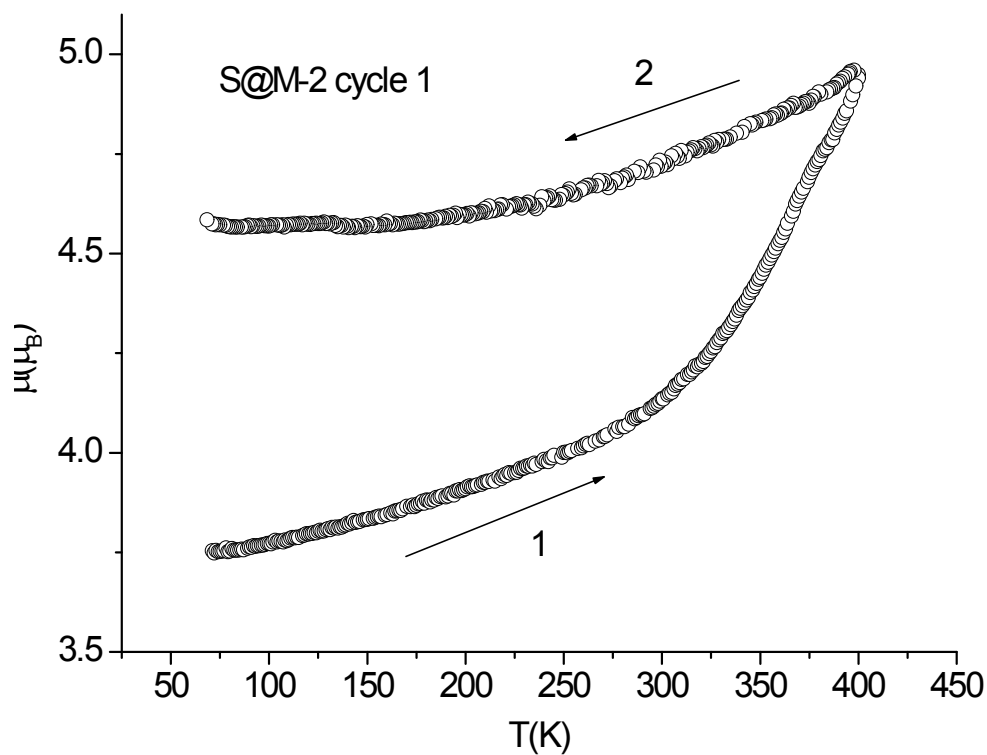

**Fig S9** Temperature dependence of the magnetic moment for  $\text{S@M-2}$  (first cycle).



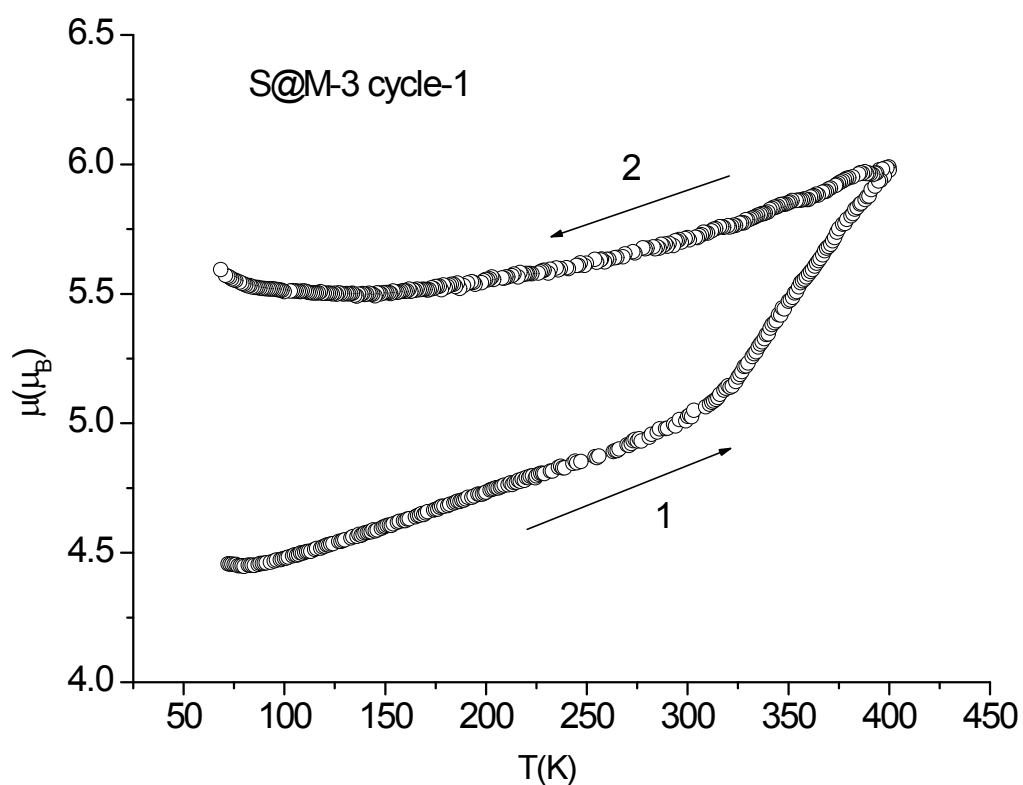

**Fig S10** Temperature dependence of the magnetic moment for S@M-3 (first cycle).

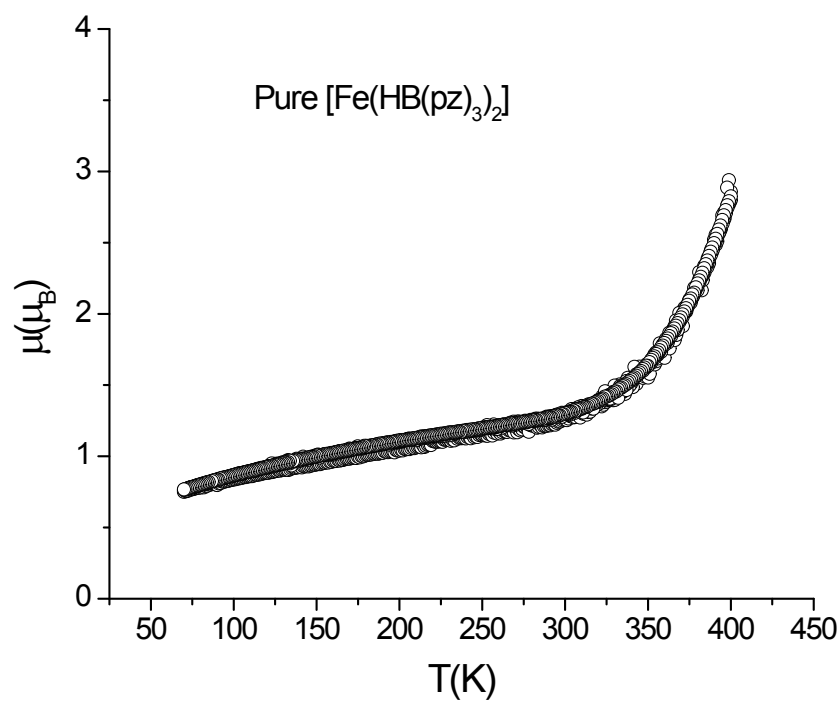

**Fig S11** Temperature dependence of the magnetic moment for [Fe(HB(pz)<sub>3</sub>)<sub>2</sub>] (first cycle).

### Temperature dependent diffuse reflectance spectrum of the S@M-3 material

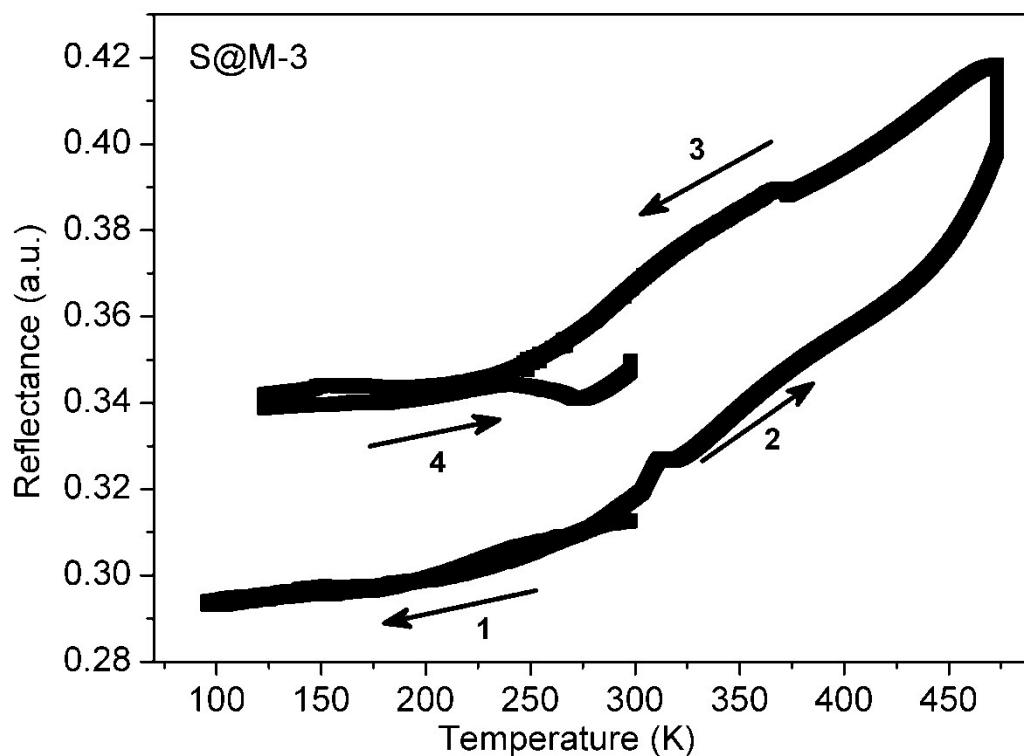

**Fig. S12** Thermal dependence of the diffuse reflectance recorded on S@M-3 sample.

**Table S1** Photographs of bulk  $[\text{Fe}(\text{HB}(\text{pz})_3)_2]@\text{NH}_2\text{-MIL-101}(\text{Al})$  as sample S@M-2 with different solvents added for colour comparison.

(The sample was dried after each new addition, either at 70 °C or at 120 °C, depending on the solvent's boiling point, under membrane pump vacuum ( $\sim 10$  Torr). The order in the following Table corresponds to the chronological order of solvent addition experiments.)

| Solvent        | before solvent addition                                                             | after solvent addition                                                               |
|----------------|-------------------------------------------------------------------------------------|--------------------------------------------------------------------------------------|
| $\text{CCl}_4$ |  |  |

|                                 |                                                                                     |                                                                                      |
|---------------------------------|-------------------------------------------------------------------------------------|--------------------------------------------------------------------------------------|
| CHCl <sub>3</sub>               | 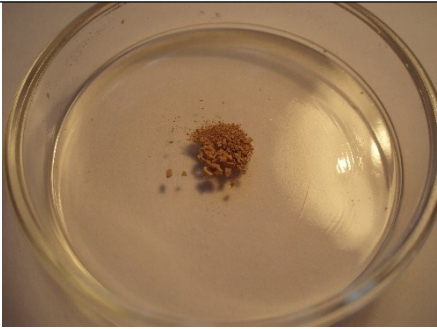   |    |
| CH <sub>2</sub> Cl <sub>2</sub> |    |    |
| CH <sub>3</sub> CN              |   |   |
| THF                             |  |  |
| MeOH                            |  |  |

|           |                                                                                     |                                                                                      |
|-----------|-------------------------------------------------------------------------------------|--------------------------------------------------------------------------------------|
| i-PrOH    | 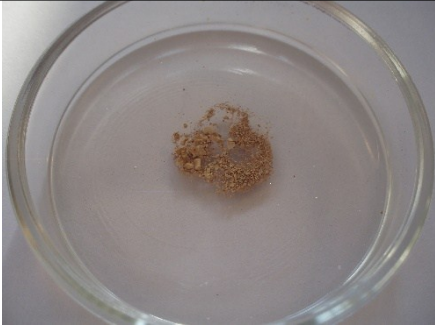   |    |
| n-BuOH    |    |    |
| n-pentane |   |   |
| n-hexane  |  |  |
| n-heptane |  |  |



|                  |                                                                                     |                                                                                      |
|------------------|-------------------------------------------------------------------------------------|--------------------------------------------------------------------------------------|
| cyclohexane      | 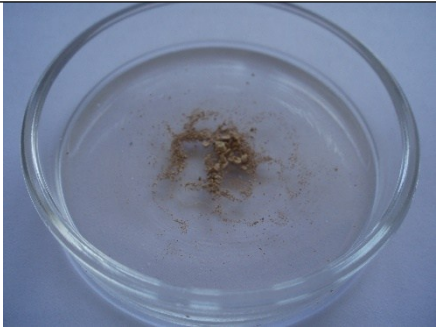   |    |
| toluene          |    |    |
| H <sub>2</sub> O |   |   |
| mesitylene       |  |  |
| DMF              |  |  |

|              |                                                                                   |                                                                                    |
|--------------|-----------------------------------------------------------------------------------|------------------------------------------------------------------------------------|
| ethylacetate | 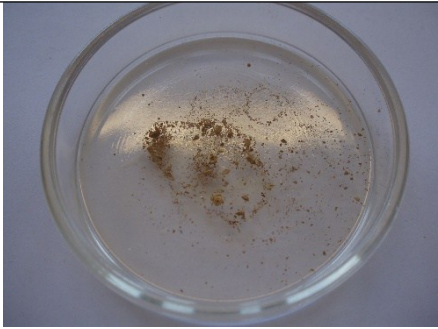 |  |
|              |                                                                                   |                                                                                    |

- 1 L. Salmon, G. Molnár, S. Cobo, P. Oulié, M. Etienne, T. Mahfoud, P. Demont, A. Eguchi, H. Watanabe, K. Tanaka and A. Bousseksou, *New J. Chem.*, 2009, **33**, 1283–1289.
- 2 A. I. Kitaigorodskii, *Molecular Crystals and Molecules*, Academic Press, New York, 1973.
- 3 B. Seoane, C. Téllez, J. Coronas and C. Staudt, *Sep. Purif. Technol.*, 2013, **111**, 72–81.
- 4 A. S. Tolla, A. Banerjee, S. Stjepanovic, J. Li, W. W. Brennessel, R. Loloee and F. A. Chavez, *Eur. J. Inorg. Chem.*, 2013, 2115–2121.
- 5 B. Hutchinson, L. Daniels, E. Henderson, P. Neill, G. J. Long and L. W. Becker, *J. Chem. Soc., Chem. Commun.*, 1979, 1003–1004.
- 6 F. Grandjean, G. J. Long, B. B. Hutchinson, L. Ohlhausen, P. Neill and J. D. Holcomb, *Inorg. Chem.*, 1989, **28**, 4406–4414.
